# Supplementary material for: Effects of Water Temperature and Structural Habitat Complexity on the Routine Swimming Speed and Escape Response of Post-Settlement Stage White Seabream
Source: MDPI journal article supplement (doi:10.3390/oceans5010003), 2024-01-12
Supplement: s1 [file s1]

## Supplementary material

**Table S1.** Summary of effects of temperature (control and high) and habitat complexity (high and low) on routine swimming speed and escape response of white seabream. The reference case for this experiment is the control temperature, high complexity habitat treatment. Tank is included as a random effect to account for shared variation among measurements from the same tank. Random effects associated with Tank represent the variation in tank means. Bold and \* *p*-values highlight significant effect ( $p < 0.05$ ).

| Standard Length       |          |          |        |           |
|-----------------------|----------|----------|--------|-----------|
| Fixed Effects         |          |          |        |           |
| Source                | Estimate | SE       | t      | P         |
| Intercept             | 3.282    | 0.091    | 36.154 | < 0.0001* |
| Temperature           | 0.247    | 0.104    | 2.379  | 0.019*    |
| Habitat               | 0.108    | 0.104    | 1.036  | 0.303     |
| Random Effects        |          |          |        |           |
| Source                |          | Variance |        |           |
| Tank                  |          | 0.000    |        |           |
| Residual              |          | 0.232    |        |           |
| Average Routine Speed |          |          |        |           |
| Fixed Effects         |          |          |        |           |
| Source                | Estimate | SE       | t      | P         |
| Intercept             | 2.729    | 0.525    | 5.192  | < 0.0001* |
| Temperature           | 0.098    | 0.152    | 0.646  | 0.519     |
| Habitat               | 0.279    | 0.148    | 1.881  | 0.063     |
| Standard Length       | -0.611   | 0.157    | -3.896 | < 0.0001* |
| Random Effects        |          |          |        |           |
| Source                |          | Variance |        |           |
| Tank                  |          | 0.000    |        |           |
| Residual              |          | 0.507    |        |           |

|                           |          |          |        |        |
|---------------------------|----------|----------|--------|--------|
|                           |          |          |        |        |
| Distance in routine speed |          |          |        |        |
| Fixed Effects             |          |          |        |        |
| Source                    | Estimate | SE       | t      | P      |
| Intercept                 | 603.97   | 187.34   | 3.224  | 0.002* |
| Temperature               | 56.36    | 54.26    | 1.039  | 0.301  |
| Habitat                   | 130.97   | 52.91    | 2.475  | 0.015* |
| Standard Length           | -111.75  | 55.91    | -1.999 | 0.049* |
| Random Effects            |          |          |        |        |
| Source                    |          | Variance |        |        |
| Tank                      |          | 0.000    |        |        |
| Residual                  |          | 6443     |        |        |
|                           |          |          |        |        |
| Latency                   |          |          |        |        |
| Fixed Effects             |          |          |        |        |
| Source                    | Estimate | SE       | t      | P      |
| Intercept                 | 34.213   | 15.338   | 2.231  | 0.028* |
| Temperature               | -1.941   | 4.599    | -0.422 | 0.689  |
| Habitat                   | 1.748    | 4.493    | 0.389  | 0.713  |
| Standard Length           | -3.443   | 4.519    | -0.762 | 0.448  |
| Random Effects            |          |          |        |        |
| Source                    |          | Variance |        |        |
| Tank                      |          | 3.244    |        |        |
| Residual                  |          | 391.906  |        |        |
|                           |          |          |        |        |

| Escape speed    |          |          |        |           |
|-----------------|----------|----------|--------|-----------|
| Fixed Effects   |          |          |        |           |
| Source          | Estimate | SE       | t      | P         |
| Intercept       | 5.328    | 0.934    | 5.707  | < 0.0001* |
| Temperature     | 0.044    | 0.270    | 0.164  | 0.869     |
| Habitat         | 0.268    | 0.263    | 1.017  | 0.312     |
| Standard Length | -0.779   | 0.276    | -2.827 | 0.006*    |
| Random Effects  |          |          |        |           |
| Source          |          | Variance |        |           |
| Tank            |          | 0.000    |        |           |
| Residual        |          | 1.465    |        |           |
|                 |          |          |        |           |
| Escape distance |          |          |        |           |
| Fixed Effects   |          |          |        |           |
| Source          | Estimate | SE       | t      | P         |
| Intercept       | 3.752    | 1.411    | 2.659  | 0.009*    |
| Temperature     | 0.130    | 0.408    | 0.319  | 0.750     |
| Habitat         | 0.295    | 0.398    | 0.740  | 0.461     |
| Standard Length | -0.269   | 0.417    | -0.647 | 0.519     |
| Random Effects  |          |          |        |           |
| Source          |          | Variance |        |           |
| Tank            |          | 0.000    |        |           |
| Residual        |          | 3.347    |        |           |

**Table S2.** Summary of Chi-square results for the effects of temperature (control and high) and habitat complexity (high and low) on responsiveness and directionality of the escape response of white seabream. Bold and \* p-values highlight significant effect ( $p < 0.05$ ).

| <b>Responsiveness</b> |          |    |    |               |
|-----------------------|----------|----|----|---------------|
|                       | $\chi^2$ | df | N  | p             |
| Temperature           | 0.403    | 1  | 93 | 0.526         |
| Habitat               | 5.172    | 1  | 88 | <b>0.023*</b> |
| <b>Directionality</b> |          |    |    |               |
| Temperature           | 0.382    | 1  | 93 | 0.527         |
| Habitat               | 0.926    | 1  | 88 | 0.336         |
